# Supplementary material
Source: HighWire-hosted journal article supplement (https://erj.ersjournals.com/content/56/2/2001253)
Supplement: inline-supplementary-material-1 [file inline-supplementary-material-1.pdf]

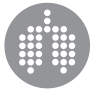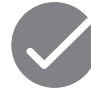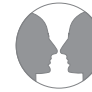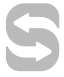

SHAREABLE PDF

# A re-analysis in exploring the association between temperature and COVID-19 transmissibility: an ecological study with 154 Chinese cities

Jinjun Ran<sup>1,7</sup>, Shi Zhao <sup>2,3,7</sup>, Lefei Han<sup>4</sup>, Gengze Liao<sup>2</sup>, Kai Wang<sup>5</sup>, Maggie H. Wang<sup>2,3</sup> and Daihai He <sup>6</sup>

**Affiliations:** <sup>1</sup>School of Public Health, Li Ka Shing Faculty of Medicine, University of Hong Kong, Hong Kong Special Administrative Region, China. <sup>2</sup>JC School of Public Health and Primary Care, Chinese University of Hong Kong, Hong Kong Special Administrative Region, China. <sup>3</sup>CUHK Shenzhen Research Institute, Shenzhen, China. <sup>4</sup>School of Nursing, Hong Kong Polytechnic University, Hong Kong Special Administrative Region, China. <sup>5</sup>Dept of Medical Engineering and Technology, Xinjiang Medical University, Urumqi, China. <sup>6</sup>Dept of Applied Mathematics, Hong Kong Polytechnic University, Hong Kong Special Administrative Region, China. <sup>7</sup>J. Ran and S. Zhao contributed equally, and thus they are considered as joint-first authors.

**Correspondence:** Daihai He, Dept of Applied Mathematics, Hong Kong Polytechnic University, Hong Kong, China. E-mail: daihai.he@polyu.edu.hk

 @ERSpublications

**In this national ecological study across 154 Chinese cities, the ambient temperature was found to have a nonlinear negative association with COVID-19 transmissibility** <https://bit.ly/3esw8rc>

**Cite this article as:** Ran J, Zhao S, Han L, *et al.* A re-analysis in exploring the association between temperature and COVID-19 transmissibility: an ecological study with 154 Chinese cities. *Eur Respir J* 2020; 56: 2001253 [<https://doi.org/10.1183/13993003.01253-2020>].

This single-page version can be shared freely online.

*To the Editor:*

Exploring the role of ambient temperature in coronavirus disease 2019 (COVID-19) transmission is of importance in understanding the patterns of the epidemic. YAO *et al.* [1] concluded that there were no significant associations of COVID-19 transmissibility with temperature and ultraviolet (UV) radiation in 62 Chinese cities. Inspired by the nonlinear dose-response relationship between ambient temperature and influenza transmissibility explored previously [2, 3], we argue that the association between COVID-19 transmissibility and temperature might be complex in nature, which may be overlooked by a linear analytical framework. We, therefore, examined the likelihood of a nonlinear association between COVID-19 transmissibility and ambient temperature.
